# Supplementary figures and images for: Impacts of FcγRIIB and FcγRIIIA Gene Polymorphisms on Systemic Lupus Erythematous Disease Activity Index
Source: Research Square preprint supplement (doi:10.21203/rs.3.rs-646001/v1), 2021-06-25

**Table. S1) Demographic characteristics of participants**

|  |  | **Patients (n=80)** | **Control (n=95)** | |
| --- | --- | --- | --- | --- |
| **Age** | | 36 ± 9.8 | 37 | ± 10.11 |
|  | |  |  |  |
| **Sex** | Female | 72 (90%) | 83 | (87.36%) |
|  | Male | 8 (10%) | 12 | (12.64%) |
|  |  |  |  |  |


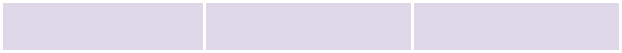

Supplement: Supplementary file 1 [file 2fc4b5a33a223471f664a623.docx]
